# Supplementary material
Source: publisher figshare collection journal article supplement (https://asha.figshare.com/articles/dataset/_/23548911)
Supplement: Supplementary file 1 [file 1]

# **Supplemental Material S1.** Distribution of participants by age and educational level.

| <b>Group (<i>n</i>)</b> | <b>Age</b>                  | <b>Educational Level (years)</b> |            |             |             |
|-------------------------|-----------------------------|----------------------------------|------------|-------------|-------------|
|                         |                             | <b>0-4</b>                       | <b>5-8</b> | <b>9-11</b> | <b>12+</b>  |
| Healthy (70)            | Younger<br>(18-40<br>years) | 4 or 5.7%                        | 3 or 4.3%  | 16 or 22.9% | 10 or 14.3% |
|                         | Middle<br>(41-60<br>years)  | 10 or 14.3%                      | 1 or 1.4%  | 4 or 5.7%   | 7 or 10.0%  |
|                         | Older<br>(61+ years)        | 8 or 11.5%                       | 2 or 2.8%  | 4 or 5.7%   | 1 or 1.4%   |
| Post-stroke<br>(30)     | Younger<br>(37-60<br>years) | 4 or 13.3%                       | 2 or 6.7%  | 4 or 13.3%  | 2 or 6.7%   |
|                         | Older<br>(61+ years)        | 10 or 33.3%                      | 3 or 10.0% | 5 or 16.7%  | 0 or 0.0%   |

*n* = number of participants.
