# Supplementary material
Source: publisher figshare collection journal article supplement (https://asha.figshare.com/articles/dataset/_/23548911)
Supplement: Supplementary file 2 [file 1]

**Supplemental Material S2.** Age and educational level effect on pLAST scores in healthy participants.

| Variable | Age        |                 |           | Educational Level |                 |           |
|----------|------------|-----------------|-----------|-------------------|-----------------|-----------|
|          | Chi-square | <i>p</i> -value | <i>df</i> | Chi-square        | <i>p</i> -value | <i>df</i> |
| pLAST-A  | 2.915      | .233            | 2         | 1.478             | .687            | 3         |
| pLAST-B  | 2.990      | .224            | 2         | 2.202             | .532            | 3         |

pLAST-A = Brazilian Portuguese Language Screening Test–Version A; pLAST-B = Brazilian Portuguese Language Screening Test–Version B; *df* = degrees of freedom.
