# Supplementary material
Source: publisher figshare collection journal article supplement (https://asha.figshare.com/articles/dataset/_/23548911)
Supplement: Supplementary file 3 [file 1]

**Supplemental Material S3.** Age and educational level effect on pLAST scores in post-stroke participants.

| Variable | Age        |                 |           | Educational Level |                 |           |
|----------|------------|-----------------|-----------|-------------------|-----------------|-----------|
|          | Chi-square | <i>p</i> -value | <i>df</i> | Chi-square        | <i>p</i> -value | <i>df</i> |
| pLAST-A  | 1.228      | .268            | 1         | 0.633             | .889            | 3         |
| pLAST-B  | 0.438      | .508            | 1         | 1.400             | .705            | 3         |

pLAST-A = Brazilian Portuguese Language Screening Test–Version A; pLAST-B = Brazilian Portuguese Language Screening Test–Version B; *df* = degrees of freedom.
